# Supplementary material
Source: PubMed Central journal article supplement (PMC3828530)
Supplement: npp2013166x1.pdf [file npp2013166x1.pdf]

**Figure S1.**

*Model 1 Effects of race and other variables on TR*

**Chi-square (model fit):** 1480.63, df=94  
**CFI/TLI:** .772/.670  
**RSMEA:** .089

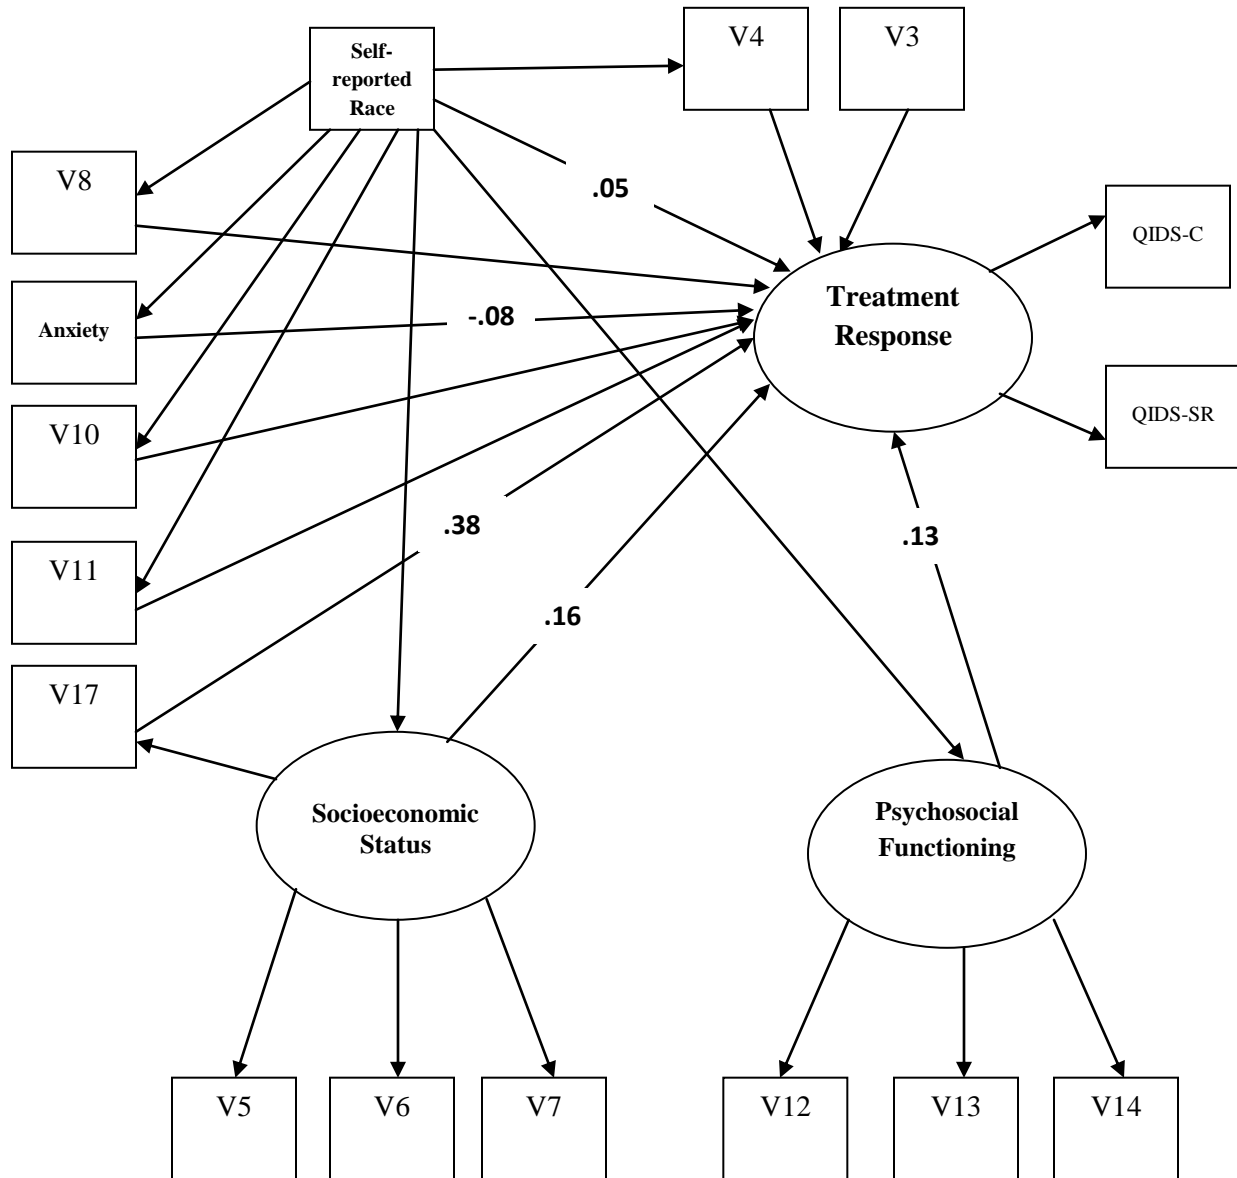

Note. Coefficients (rounded to two decimal places) are shown only for direct paths to Treatment Response significant at  $p \leq .05$ . For all models, coefficients are in standardized units, i.e., the effect of one standard deviation change in predictors on corresponding change in Treatment Response.
