# Supplementary material
Source: PubMed Central journal article supplement (PMC3828530)
Supplement: npp2013166x3.pdf [file npp2013166x3.pdf]

Supplemental Information

**Table S1. Sample Characteristics:**

| Characteristic                                                   | Mean                   | SD       |
|------------------------------------------------------------------|------------------------|----------|
| Genetic Ancestry                                                 | -2.0 x10 <sup>-9</sup> | 0.06     |
| Years of Schooling                                               | 13.59                  | 3.25     |
| Cumulative Illness Severity Index (CIRS)                         | 1.28                   | 0.57     |
| Anxiety                                                          | 6.17                   | 2.54     |
| Quality of life enjoyment and satisfaction questionnaire (QLESQ) | 42.17                  | 15.01    |
| Work and social adjustment scale (WSAS)                          | 23.31                  | 9.17     |
| Perceived mental functioning (SF12)                              | 27.01                  | 8.75     |
| Length of time in level one treatment (number of days)           | 75.14                  | 26.97    |
| QIDS-C score                                                     | 47.44%                 | 0.34     |
| QIDS-SR score                                                    | 44.00%                 | 0.36     |
| HRSD <sub>17</sub> Score                                         | 41.48%                 | 0.43     |
|                                                                  | <u>n</u>               | <u>%</u> |
| Self-reported race                                               |                        |          |
| Black                                                            | 299                    | 16       |
| White                                                            | 1464                   | 78       |
| Other                                                            | 114                    | 6        |
| Gender                                                           |                        |          |
| Male                                                             | 719                    | 38       |
| Female                                                           | 1158                   | 62       |
| Marital status                                                   |                        |          |
| Married                                                          | 799                    | 43       |
| Not Married (Single divorced widowed)                            | 1078                   | 57       |
| Occupation                                                       |                        |          |
| Employed                                                         | 1053                   | 56       |
| Not employed                                                     | 686                    | 37       |
| Retired                                                          | 138                    | 7        |
| Insurance*                                                       |                        |          |
| Private                                                          | 966                    | 52       |
| Public/No insurance                                              | 871                    | 46       |
| Psychiatric comorbidity*                                         |                        |          |
| Yes                                                              | 1011                   | 54       |
| No                                                               | 845                    | 46       |
| History of suicide attempts*                                     |                        |          |
| Yes                                                              | 276                    | 15       |
| No                                                               | 1600                   | 85       |

\*Numbers do not all add up to 1877 due to missing data in some cases.
