# Supplementary material
Source: PubMed Central journal article supplement (PMC3828530)
Supplement: npp2013166x4.pdf [file npp2013166x4.pdf]

Supplemental Information

**Table S2.** *Classification Analysis for Genetic Ancestry*

| Predicted Genetic Ancestry  | Self-Reported Race     |              |            |
|-----------------------------|------------------------|--------------|------------|
|                             | African-American/black | White        | “Other”    |
| African                     | 289 (96.7 %)           | 1 (0.1%)     | 16 (14.0%) |
| European                    | 1(0.3%)                | 1321 (90.2%) | 56 (49%)   |
| Neither African or European | 9 (3 %)                | 142 (9.7%)   | 42 (36.8%) |
| TOTAL                       | 299                    | 1464         | 114        |

Note. For African Americans, sensitivity = 97%; specificity = 99%; For Whites, sensitivity = 90%; specificity = 86%; For “Other” sensitivity = 37%; specificity = 91%.
