# Supplementary material
Source: PubMed Central journal article supplement (PMC3828530)
Supplement: npp2013166x5.pdf [file npp2013166x5.pdf]

## Supplemental Information

**Table S3.** *Variable Key for Correlation Matrix, Factor Analyses and Structural Equation Models*

**V1** – Genetic ancestry

**V2** – Self-reported race

**V3** – Gender

**V4** – Marital status

**V5** – Years of schooling

**V6** – Employment

**V7** – Health insurance

**V8** – Cumulative Illness Rating Scale severity index for general medical conditions (CIRS)

**V9** – Anxiety score

**V10** – Psychiatric comorbidity

**V11** – History of suicide attempt (s)

**V12** – Quality of life enjoyment and satisfaction questionnaire (QLESQ)

**V13** – Work and social adjustment scale (WSAS)

**V14** – Short Form 12-Mental -Perceived mental functioning (SF12)

**V15** – Quick Inventory of Depressive Symptomatology - Clinician-Rated (QIDS-C) % change score

**V16** – Quick Inventory of Depressive Symptomatology- Self-Rated (QIDS-SR) % change score

**V17** – Length of time in study (number of days)

**V18** – Hamilton Rating Scale of Depression – 17 item (HRSD<sub>17</sub>) % change score
