# Supplementary material
Source: PubMed Central journal article supplement (PMC3828530)
Supplement: npp2013166x6.pdf [file npp2013166x6.pdf]

Supplemental Information

**Table S4.** Correlation Matrix between Variables in Structural Equation Models (See Table S3 -variable key)

|            | V1   | V2   | V3   | V4   | V5   | V6   | V7   | V8   | V9   | V10  | V11  | V12  | V13  | V14  | V15 | V16 | V17 |
|------------|------|------|------|------|------|------|------|------|------|------|------|------|------|------|-----|-----|-----|
| <b>V1</b>  |      |      |      |      |      |      |      |      |      |      |      |      |      |      |     |     |     |
| <b>V2</b>  | .72  |      |      |      |      |      |      |      |      |      |      |      |      |      |     |     |     |
| <b>V3</b>  | .04  | .01  |      |      |      |      |      |      |      |      |      |      |      |      |     |     |     |
| <b>V4</b>  | -.10 | -.06 | -.06 |      |      |      |      |      |      |      |      |      |      |      |     |     |     |
| <b>V5</b>  | -.14 | -.09 | -.10 | .02  |      |      |      |      |      |      |      |      |      |      |     |     |     |
| <b>V6</b>  | -.12 | -.06 | .00  | .04  | .26  |      |      |      |      |      |      |      |      |      |     |     |     |
| <b>V7</b>  | -.17 | -.08 | -.02 | .22  | .28  | .40  |      |      |      |      |      |      |      |      |     |     |     |
| <b>V8</b>  | .12  | .11  | -.05 | .07  | -.20 | -.18 | -.11 |      |      |      |      |      |      |      |     |     |     |
| <b>V9</b>  | .10  | .09  | .05  | .02  | -.24 | -.19 | -.17 | .26  |      |      |      |      |      |      |     |     |     |
| <b>V10</b> | .10  | .05  | .02  | -.07 | -.16 | -.06 | -.08 | .04  | .21  |      |      |      |      |      |     |     |     |
| <b>V11</b> | .06  | .05  | .10  | -.07 | -.09 | -.06 | -.08 | .03  | .09  | .11  |      |      |      |      |     |     |     |
| <b>V12</b> | -.06 | -.05 | .02  | .07  | .12  | .19  | .16  | -.16 | -.46 | -.23 | -.10 |      |      |      |     |     |     |
| <b>V13</b> | .07  | .06  | .00  | -.10 | -.08 | -.18 | -.13 | .09  | .33  | .23  | .08  | -.66 |      |      |     |     |     |
| <b>V14</b> | .11  | .07  | -.08 | .09  | -.13 | -.07 | -.01 | .15  | -.09 | -.11 | -.07 | .37  | -.44 |      |     |     |     |
| <b>V15</b> | -.12 | -.10 | .02  | .03  | .14  | .13  | .17  | -.11 | -.18 | -.09 | -.03 | .22  | -.17 | .01  |     |     |     |
| <b>V16</b> | -.13 | -.10 | .05  | .01  | .14  | .11  | .13  | -.10 | -.15 | -.07 | -.03 | .15  | -.13 | -.05 | .84 |     |     |
| <b>V17</b> | -.03 | -.03 | .05  | .02  | .09  | .03  | .04  | -.06 | -.05 | -.04 | -.02 | .05  | -.02 | -.00 | .39 | .34 |     |
| <b>V18</b> | -.08 | -.06 | .04  | .03  | .13  | .11  | .11  | -.09 | .01  | -.07 | -.03 | .07  | -.08 | -.08 | .67 | .66 | .27 |

Note. Coefficients are Pearson product moment correlations tested at two-tailed significance levels. All correlations above correlations above  $|.06|$  are significant at  $p \leq .01$ ; Correlations above  $|.04|$  are significant at  $p \leq .05$ .
