# Supplementary material
Source: PubMed Central journal article supplement (PMC3828530)
Supplement: npp2013166x7.pdf [file npp2013166x7.pdf]

Supplemental Information

**Table S5.** PCA Factor loadings for predictor and outcome variables (see Table S1-variable key).

| Variables | Principal Components and loadings |             |      |            |     |     |
|-----------|-----------------------------------|-------------|------|------------|-----|-----|
|           | 1                                 | 2           | 3    | 4          | 5   | 6   |
| V1        |                                   |             | .91  |            |     |     |
| V2        |                                   |             | -.91 |            |     |     |
| V3        |                                   |             |      |            |     | .75 |
| V4        |                                   |             |      |            | .63 |     |
| V5        |                                   |             |      | <b>.49</b> |     |     |
| V6        |                                   |             |      | <b>.72</b> |     |     |
| V7        |                                   |             |      | <b>.81</b> |     |     |
| V8        |                                   |             |      |            | .66 |     |
| V9        |                                   | -.51        |      |            | .46 |     |
| V10       |                                   | -.38        |      |            |     | .30 |
| V11       |                                   |             |      |            |     | .61 |
| V12       |                                   | <b>.84</b>  |      |            |     |     |
| V13       |                                   | <b>-.85</b> |      |            |     |     |
| V14       |                                   | <b>.68</b>  |      |            |     |     |
| V15       | <b>.90</b>                        |             |      |            |     |     |
| V16       | <b>.90</b>                        |             |      |            |     |     |
| V17       | .55                               |             |      |            |     |     |
| V18       | <b>.83</b>                        |             |      |            |     |     |

Note. Components extracted from Principal Components Analysis, varimax rotation with Kaiser normalization. The three latent constructs used in our models came from Component 1 = *Treatment Response* (V15, V16, [V18<sup>a</sup>]); Component 2 = *Psychosocial Functioning* (V12, V13, V14); Component 4 = *Socioeconomic Status/SES* (V5, V6, V7).
