# Supplementary material
Source: PubMed Central journal article supplement (PMC3828530)
Supplement: npp2013166x9.pdf [file npp2013166x9.pdf]

Supplemental Information

**Table S7.** Standardized total, direct and indirect effects for genetic ancestry and self-reported race in test null and alternate models.

| Model                         | Genetic Ancestry |          |          |         | Self-Reported Race |         |          |         |
|-------------------------------|------------------|----------|----------|---------|--------------------|---------|----------|---------|
|                               | Direct           |          | Indirect |         | Direct             |         | Indirect |         |
|                               | B (s.e. B)       | $\beta$  | B        | $\beta$ | B (s.e. B)         | $\beta$ | B        | $\beta$ |
| Model 1 - full                | NA               |          | NA       |         | -.037 (.016)       | -.050*  | -.031    | -.043*  |
| Model 2 - full                | -.388(.177)      | -.066*   | -.195    | -.033   | -.004 (.022)       | -.005   | -.030    | -.041   |
| Model 3- reduced              | -.387 (.177)     | -.066*   | -.194    | -.033   | -.005 (.022)       | -.006   | -.029    | -.040   |
| Model 4 - final               | -.581 (.194)     | -.100**  | -.167    | -.029   | -.012 (.024)       | -.017   | NA       | NA      |
| Model 4 (HRSD <sub>17</sub> ) | -.604 (.190)     | -.108*** | -.142    | -.025   | -.010 (.023)       | -.014   | NA       | NA      |

Note. Standardized Coefficients ( $\beta$ ) are directly comparable within models across predictors, and represent the standard deviation change in outcome for one standard deviation change in the predictors. Unstandardized coefficients (B) represent the unit change in the criterion (Treatment Response) raw score for each unit change in the predictor raw score and are not directly comparable across predictors.

\* $p \leq .05$ ; \*\* $p \leq .01$ , \*\*\* $p \leq .001$
