# Supplementary material
Source: PubMed Central journal article supplement (PMC3828530)
Supplement: npp2013166x10.pdf [file npp2013166x10.pdf]

Supplemental Information

**Table S8.** *Goodness of Fit Indicators for the tested Models*

| Model                                   | Model Fit Indices |           |      |      |       |         |
|-----------------------------------------|-------------------|-----------|------|------|-------|---------|
|                                         | Chi-square        | <i>df</i> | CFI  | TLI  | RMSEA | AIC     |
| Model 1                                 | 1480.63           | 94        | .772 | .670 | .089  | 1596.63 |
| Model 2                                 | 1571.30           | 108       | .805 | .726 | .085  | 1695.30 |
| Model 3 - reduced                       | 854.52            | 47        | .882 | .803 | .096  | 940.52  |
| Model 4 - final                         | 6.69              | 3         | .999 | .995 | .026  | 40.69   |
| Model 4 (including HRSD <sub>17</sub> ) | 72.66             | 7         | .986 | .958 | .071  | 112.66  |

Note. CFI = Comparative Fit index; TLI = Tucker-Lewis coefficient; RMSEA= root-mean-square-error of approximation; AIC = Akaike Information Criterion.

For CFI and TLI, values range from 0 to 1, closer to 1.00 indicates better fit, greater than .950 is ideal; For RSMEA, closer to zero is better, less than .070 is ideal; For AIC, smaller indicates better fit.
