# Supplementary material
Source: PubMed Central journal article supplement (PMC3828530)
Supplement: npp2013166x11.pdf [file npp2013166x11.pdf]

Table S9. Relationship between Genetic African Ancestry proportion estimates and treatment response on outcome measures.

| Outcome Measures     | African Ancestry (K=3) |         | African Ancestry (K=4) |         |
|----------------------|------------------------|---------|------------------------|---------|
|                      | B (s.e.)               | $\beta$ | B (s.e.)               | $\beta$ |
| QIDS-C <sup>a</sup>  | -0.12 (.02)            | -.12*** | -0.13 (.03)            | -.12*** |
| QIDS-C <sup>b</sup>  | -0.09 (.04)            | -.08**  | -0.08 (.04)            | -.08*   |
| QIDS-SR <sup>a</sup> | -0.14 (.03)            | -.13*** | -0.15 (.03)            | -.13*** |
| QIDS-SR <sup>b</sup> | -0.13 (.04)            | -.12*** | -0.13 (.04)            | -.11**  |
| HRSD <sup>a</sup>    | -0.10 (.01)            | -.08**  | -0.11 (.04)            | -.08**  |
| HRSD <sup>b</sup>    | -0.08 (.05)            | -.06    | -0.07 (.05)            | -.05    |

Note. Proportion of African ancestry (%) derived from STRUCTURE analysis. The unstandardized regression coefficients (B) represent the percent change in treatment response on each outcome measure for each percent increase in African Ancestry. The standardized coefficients ( $\beta$ ) represent the standard deviation change in outcome measures for each standard deviation increase in African Ancestry and are comparable across outcome measures.

- a. Unadjusted (bivariate) regression model.
- b. Adjusted regression model controlling for self-reported race, education, employment status, insurance status, anxiety, psychosocial factors, and time in study.
