# Supplementary material
Source: PubMed Central journal article supplement (PMC3828530)
Supplement: npp2013166x12.pdf [file npp2013166x12.pdf]

**Table S9b.** Genetic ancestral proportions among self-reported racial groups.

| Self-reported Race | Population Clusters |               |                  |              |
|--------------------|---------------------|---------------|------------------|--------------|
|                    | <i>YRI</i>          | <i>CEU</i>    | <i>CHB + JPT</i> | <i>N/A</i>   |
| <b>Black</b>       | 85.5 (13.5)         | 13.5 (12.7)   | 0.99 (3.60)      |              |
| <b>White</b>       | 1.21 (4.01)         | 91.27 (18.50) | 7.52 (17.65)     |              |
| <b>Other</b>       | 18.68 (30.28)       | 58.67 (35.63) | 22.65 (28.39)    |              |
|                    | <i>YRI</i>          | <i>CEU</i>    | <i>CHB + JPT</i> | <i>MEX</i>   |
| <b>Black</b>       | 85.1 (13.4)         | 10.7 (12.7)   | 1.28 (3.89)      | 2.90 (3.50)  |
| <b>White</b>       | 1.23 (4.04)         | 81.42 (28.24) | 8.02 (19.13)     | 9.33 (19.05) |
| <b>Other</b>       | 19.52 (28.86)       | 47.81 (39.15) | 23.69 (29.59)    | 8.97 (29.86) |

Note. All estimates (%) are derived from STRUCTURE analysis. Upper rows show mean (standard deviation) estimates when for K=3 populations, while lower rows show estimates for k=4 populations.

*Median* estimates (not shown in table) for **YRI** ancestry (k=3/k=4) are 88.6/88.1 for Black, 0.2/0.2 for White, and 5.30/7.00 for other race. Median estimates for remaining ancestral groups are not reported here, but are available upon request.
